# Supplementary material for: Sodium-glucose cotransporter-2 inhibitor for renal function preservation in patients with type 2 diabetes mellitus: a Korean Diabetes Association and Korean Society of Nephrology consensus statement
Source: PubMed Central journal article supplement — Kidney Res Clin Pract. 2020 Sep 30;39(3):269–83. doi: 10.23876/j.krcp.20.132 (PMC7530358; doi:10.23876/j.krcp.20.132), 2020-09-30
Supplement: KRCP-39-269_Supple.pdf [file KRCP-39-269_Supple.pdf]

**Supplementary Table 1. Characteristics of randomized clinical trials included in the meta-analysis**

| Author                | Year | Experimental  | Control              | Background antidiabetic mediation(s)      | Length of treatment | Number of participants |
|-----------------------|------|---------------|----------------------|-------------------------------------------|---------------------|------------------------|
| Barnett et al [22]    | 2014 | Empagliflozin | Placebo              | Naïve                                     | 52 weeks            | 290                    |
| Bailey et al [23]     | 2013 | Dapagliflozin | Sulphonylurea        | Various                                   | 208 weeks           | 801                    |
| Haering et al [24]    | 2015 | Empagliflozin | Placebo              | Metformin, sulphonylurea                  | 76 weeks            | 666                    |
| Kaku et al [21]       | 2017 | Empagliflozin | Placebo              | Various                                   | Median: 3.1 years   | 1,517                  |
| Kohan et al [25]      | 2014 | Dapagliflozin | Placebo              | Insulin, sulphonylurea, thiazolidinedione | 104 weeks           | 252                    |
| Kovacs et al [26]     | 2015 | Empagliflozin | Placebo              | Metformin, thiazolidinedione              | 76 weeks            | 498                    |
| Merker et al [27]     | 2015 | Empagliflozin | Placebo              | Metformin                                 | 76 weeks            | 637                    |
| Roden et al [28]      | 2015 | Empagliflozin | Placebo, sitagliptin | Naïve                                     | 76 weeks            | 676                    |
| Rosenstock et al [29] | 2015 | Empagliflozin | Placebo              | Insulin                                   | 78 weeks            | 494                    |
| Wanner et al [10]     | 2016 | Empagliflozin | Placebo              | Various                                   | Median: 2.6 years   | 7,020                  |
| Wilding et al [30]    | 2014 | Dapagliflozin | Placebo              | Insulin                                   | 104 weeks           | 800                    |
| Wiviott et al [9]     | 2019 | Dapagliflozin | Placebo              | Various                                   | Median: 4.2 years   | 17,160                 |

|                          | Bias arising from the randomization process | Bias due to deviations from intended interventions | Bias in measurement of the outcome | Bias due to missing outcome data | Bias in selection of the reported result |
|--------------------------|---------------------------------------------|----------------------------------------------------|------------------------------------|----------------------------------|------------------------------------------|
| Barnett AH et al. 2014   | ●                                           | ●                                                  | ●                                  | ●                                | ●                                        |
| Bailey CJ et al. 2013    | ●                                           | ●                                                  | ●                                  | ●                                | ●                                        |
| Haering HU et al. 2015   | ●                                           | ●                                                  | ●                                  | ●                                | ●                                        |
| Kohan DE et al. 2014     | ●                                           | ●                                                  | ●                                  | ●                                | ●                                        |
| Kovacs CS et al. 2015    | ●                                           | ●                                                  | ●                                  | ●                                | ●                                        |
| Merker L et al. 2015     | ●                                           | ●                                                  | ●                                  | ●                                | ●                                        |
| Roden M et al. 2015      | ●                                           | ●                                                  | ●                                  | ●                                | ●                                        |
| Rosenstock J et al. 2015 | ●                                           | ●                                                  | ●                                  | ●                                | ●                                        |
| Wanner C et al. 2016     | ●                                           | ●                                                  | ●                                  | ●                                | ●                                        |
| Wilding JP et al. 2014   | ●                                           | ●                                                  | ●                                  | ●                                | ●                                        |
| Wiviott SD et al. 2019   | ●                                           | ●                                                  | ●                                  | ●                                | ●                                        |

**Supplementary Figure 1.** Risk of bias assessment.

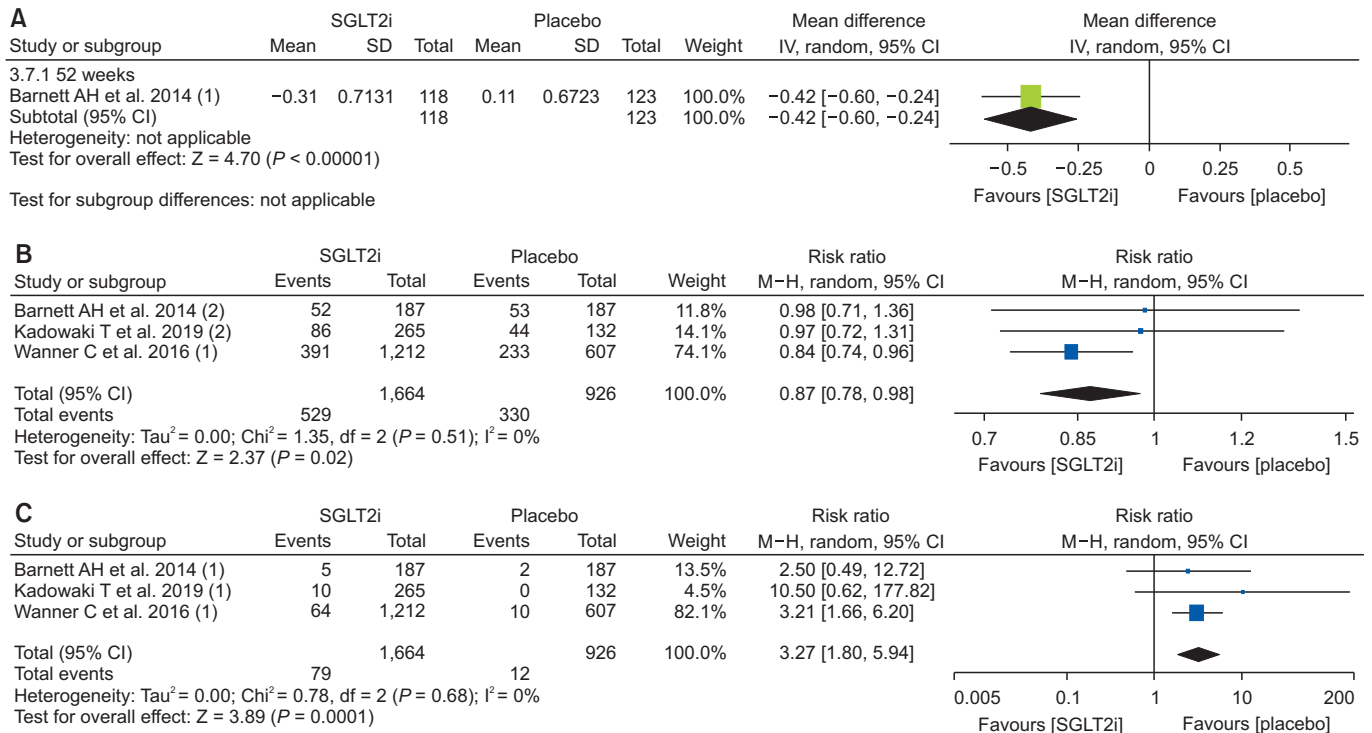

**Supplementary Figure 2.** Results of patients with estimated glomerular filtration rate of less than 60 mL/min/1.73 m<sup>2</sup>. Effect of sodium-glucose cotransporter-2 inhibitors (SGLT2i) on (A) change of glycosylated hemoglobin, (B) hypoglycemia, and (C) genital infection. CI, confidence interval; IV, inverse variance; SD, standard deviation.

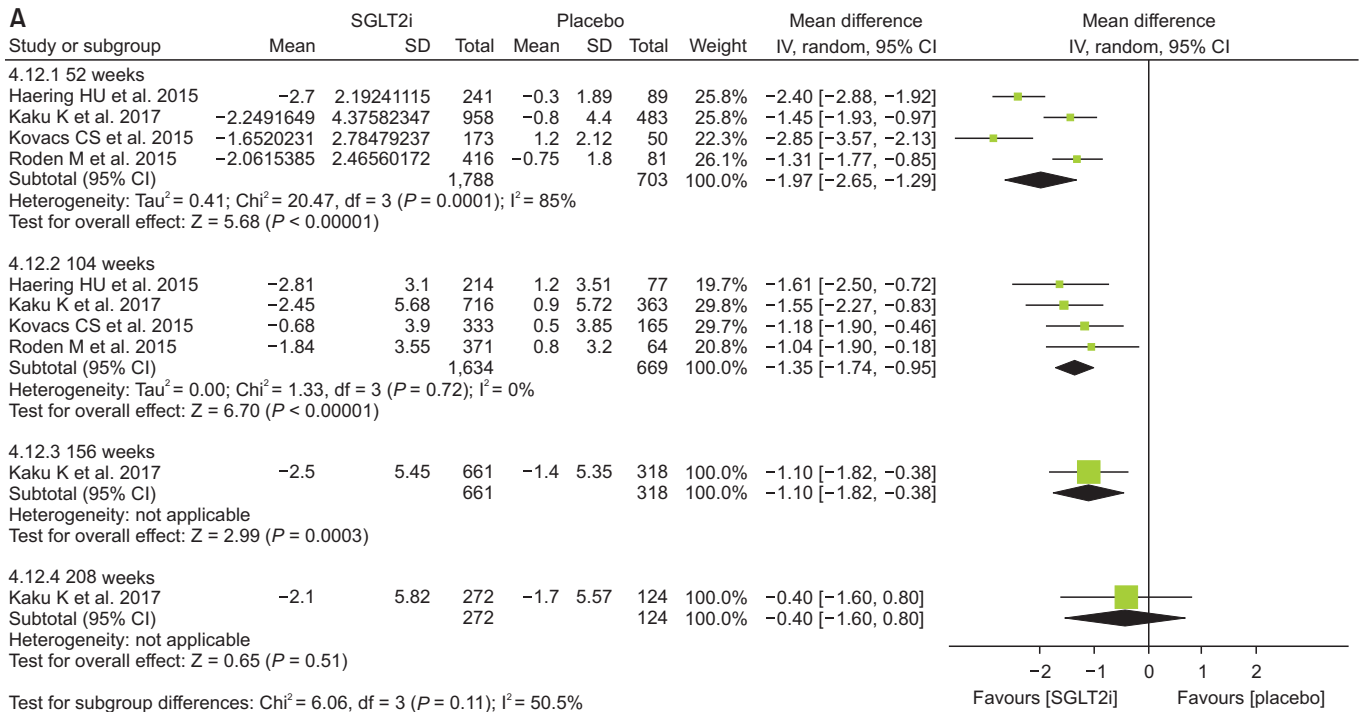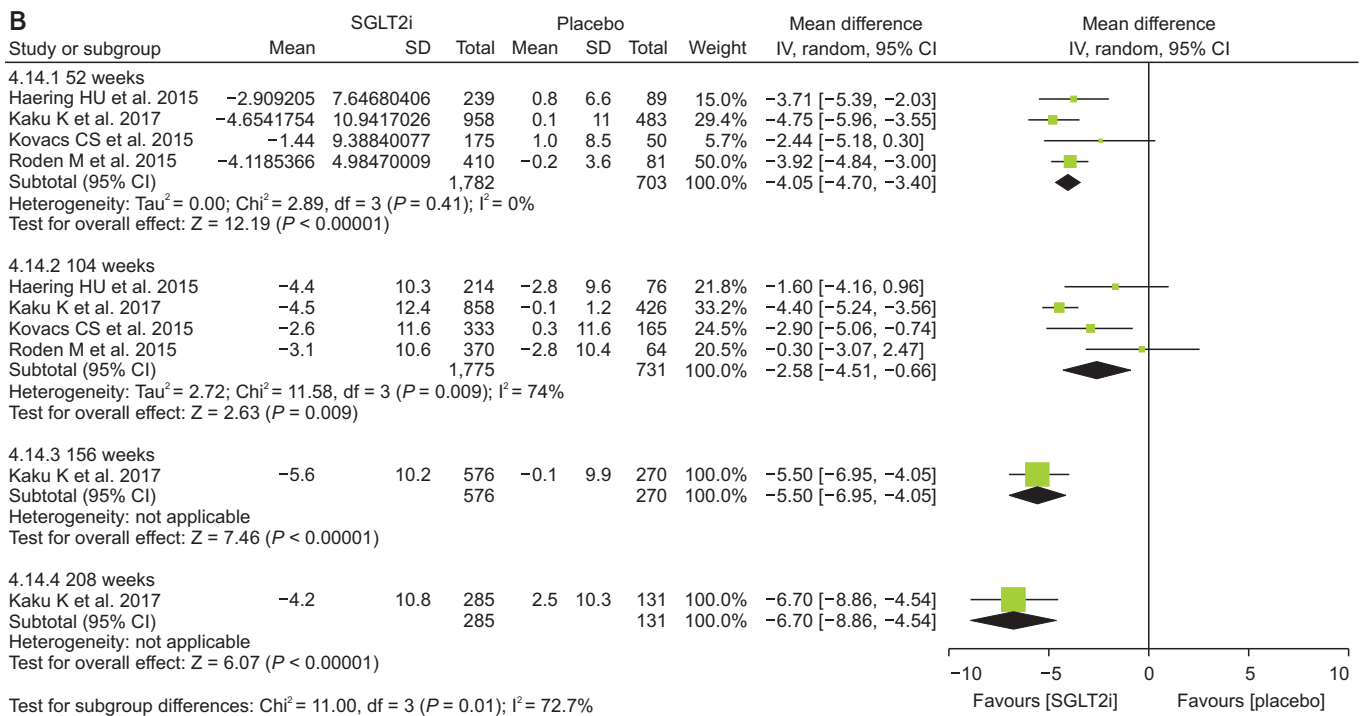

**Supplementary Figure 3. Result of Asian dominant studies.** Effects of sodium-glucose cotransporter-2 inhibitors (SGLT2i) on (A) body weight, (B) systolic blood pressure, (C) diastolic blood pressure, (D) hypoglycemia, (E) genital infection, (F) urinary tract infection, and (G) volume depletion.

CI, confidence interval; IV, inverse variance; M-H, Mantel-Haenszel; SD, standard deviation.

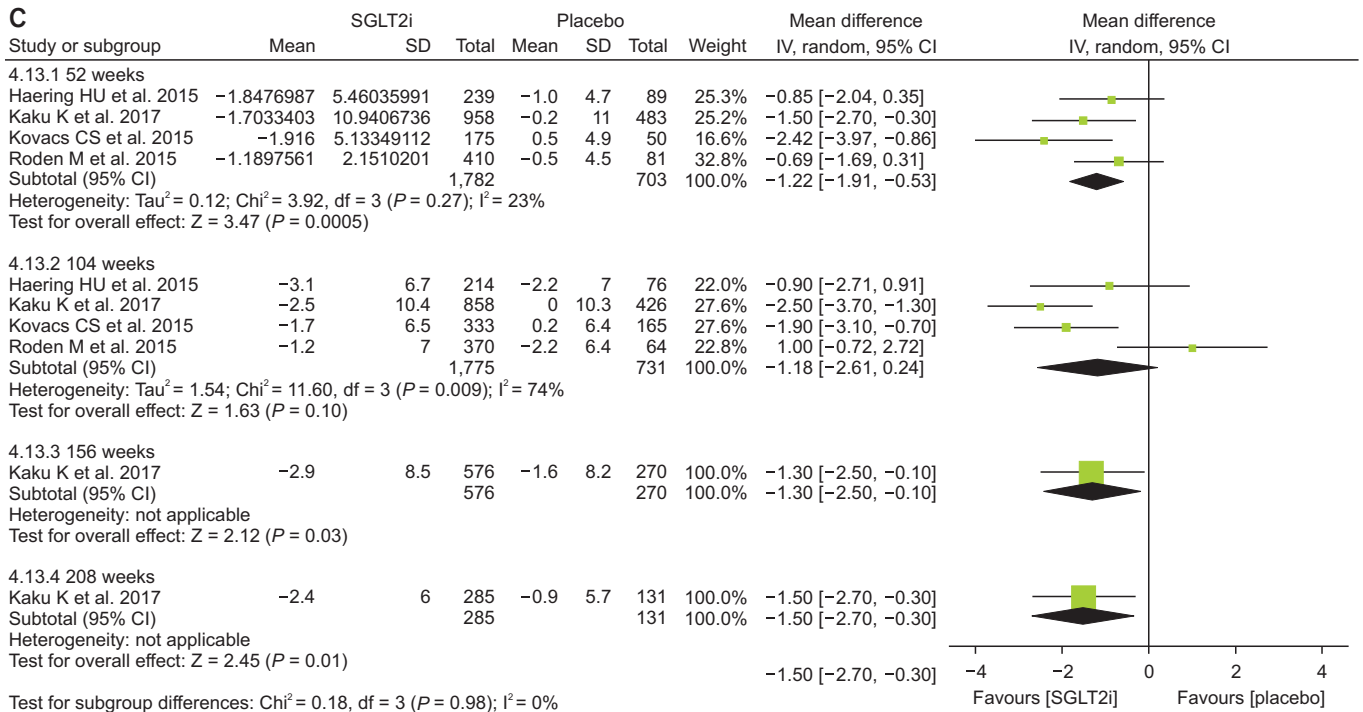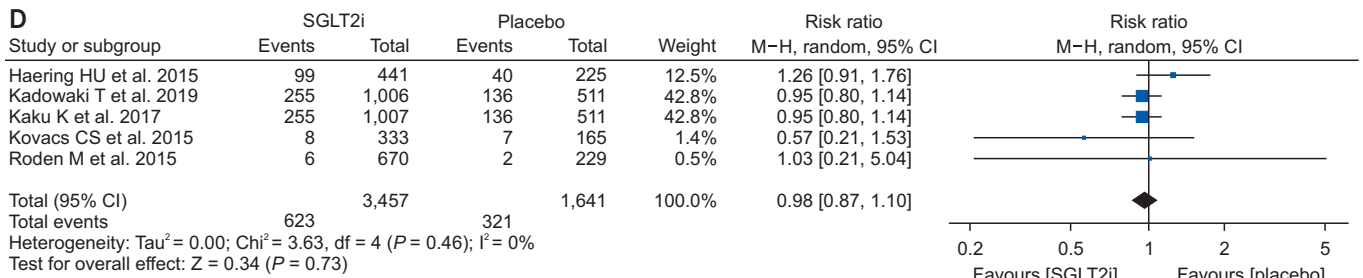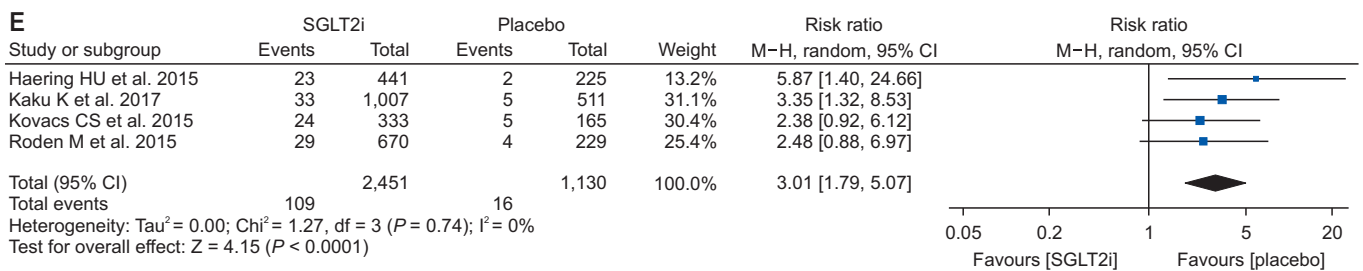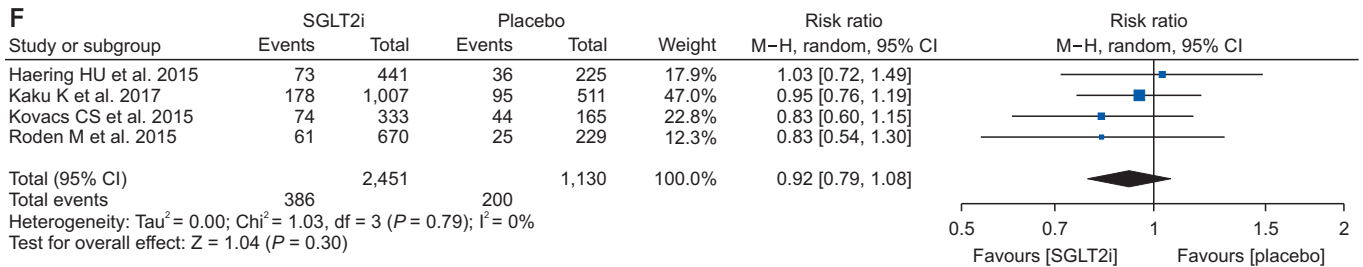

Supplementary Figure 3. Continued 1.

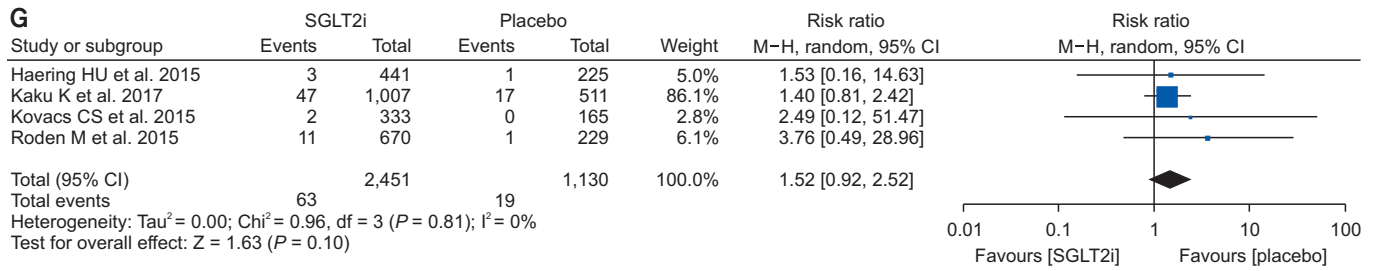

**Supplementary Figure 3. Continued 2.**
